# Supplementary material
Source: PubMed Central journal article supplement (PMC3388602)
Supplement: NIHMS282283-supplement-01.pdf [file NIHMS282283-supplement-01.pdf]

1  
2  
3  
4  
5  
6  
7 **SUPPLEMENTARY MATERIAL**  
8  
9

10 **Supplementary Fig. 1. Secretion of *P. acnes* CAMP factor *in vivo*.** The  
11 secretion of CAMP factor in mouse ear was detected 24 hr after bacterial  
12 injection. Ears of ICR mice were injected intradermally with PBS (25  $\mu$ l; left ear)  
13 or *P. acnes* ( $1 \times 10^7$  CFU/ in 25  $\mu$ l PBS; right ear) for 24 hr. Ear tissues of a  
14 punched 8 mm biopsy were homogenized and centrifuged in PBS. The  
15 supernatant from homogenized ears (1  $\mu$ g) and purified CAMP factors (10  $\mu$ g)  
16 as a positive control were subjected to western blotting. CAMP factor was  
17 detected by mouse anti-CAMP factor serum [45]. An arrow indicates CAMP  
18 factor appearing at a molecular weight of 29 kDa.  
19  
20  
21  
22  
23  
24  
25  
26  
27  
28  
29  
30  
31  
32  
33  
34  
35  
36  
37  
38  
39  
40  
41  
42  
43  
44  
45  
46  
47  
48  
49  
50  
51  
52  
53  
54  
55  
56  
57  
58  
59  
60  
61  
62  
63  
64  
65

1  
2  
3  
4  
5  
6  
7 **Supplementary Fig. 2. Hemolytic effect of CAMP factors on erythrocytes.**  
8

9  
10 After centrifugation at  $800 \times g$  for 10 min, erythrocytes were washed three  
11 times and resuspended (1:1 dilution) in PBS. The resuspended erythrocytes  
12 (200  $\mu$ l) were incubated with purified GFP or CAMP factors at 25  $\mu$ g, with 2%  
13 TritonX-100 (Sigma-Aldrich, St. Louis, MO; as an indicator of complete  
14 hemolysis), and without treatment as control by rotation at 37°C for 3 h.  
15

16  
17 Afterward, cells were centrifuged at  $800 \times g$  for 10 min, and the supernatant  
18 was taken for estimation of hemolysis using a microplate reader at OD<sub>540</sub> nm.  
19

20  
21 The absorbance of hemoglobin release was measured at 540 nm and is  
22 expressed as % of TritonX-100 induced-hemolysis. The percentage of  
23 hemolytic effect was calculated by the following formula: [(OD<sub>540</sub> for the  
24 sample with hemolysin - OD<sub>540</sub> for the control without hemolysin)/(OD<sub>540</sub> for  
25 the complete lysis caused by TritonX-100)]  $\times$  100. Error bars represent mean  $\pm$   
26 SE of four mice (\*\**p*<0.0005, by Student's *t*-test).  
27  
28  
29  
30  
31  
32  
33  
34  
35  
36  
37  
38  
39  
40  
41  
42  
43  
44  
45  
46  
47  
48  
49  
50  
51  
52  
53  
54  
55  
56  
57  
58  
59  
60  
61  
62  
63  
64  
65

1  
2  
3  
4  
5  
6  
7 **Supplementary Fig. 3. Inflammation caused by injection of live *P. acnes*. (A)**  
8  
9  
10 live *P. acnes* ( $1 \times 10^7$  CFU) was injected into ears of mice in the absence (right  
11 ears) or presence (left ears) of anti-GUS (a) or anti-CAMP factor (b) serum.  
12  
13 Ears redness (arrows) of mice was visualized 3 days after injection. Bar = 1 cm.  
14  
15  
16 Reduced ear redness was visualized in left ear of mice injected with  
17 anti-CAMP factor serum (b) but not in that of mice injected with anti-GUS  
18 serum (a) (B) Relative left ear inflammation of mice injected with *P. acnes* ( $1 \times$   
19  $10^7$  CFU) in the presence of anti-GUS serum (open bar) or anti-CAMP factor  
20 serum (solid bar). (C) Relative right ear inflammation of mice injected with live  
21 *P. acnes* ( $1 \times 10^7$  CFU) alone. The ear redness was quantified by ImageJ  
22 software (National Institutes of Health, Bethesda, MD). Error bars represent  
23 mean  $\pm$  SE of four mice (\*\*\*)  $p < 0.0005$ , by Student's *t*-test).  
24  
25  
26  
27  
28  
29  
30  
31  
32  
33  
34  
35  
36  
37  
38  
39  
40  
41  
42  
43  
44  
45  
46  
47  
48  
49  
50  
51  
52  
53  
54  
55  
56  
57  
58  
59  
60  
61  
62  
63  
64  
65

1  
2  
3  
4  
5  
6  
7 **Supplementary Fig. 4. Vaccination with CAMP factor conferred protective**  
8  
9  
10 **effect on *P. acnes*-induced ear swelling.** Seven weeks after vaccinated with  
11  
12 GUS- (open bar) and CAMP factor- (solid bar) capsulated whole leaves, mice  
13  
14 were challenged intradermally with an amount of 25  $\mu$ l aliquots of live *P. acnes*  
15  
16  
17 (1 x 10<sup>7</sup> CFU) suspended in PBS overnight to right ears. As a control, 25  $\mu$ l of  
18  
19  
20 PBS was injected into the left ear of the same mice. The increase in ear  
21  
22  
23 thickness was measured using a micro caliper after the bacterial challenge.  
24  
25  
26  
27  
28  
29  
30 The increase in ear thickness of *P. acnes* challenged ear was calculated as %  
31  
32  
33  
34  
35  
36  
37  
38  
39  
40  
41  
42  
43  
44  
45  
46  
47  
48  
49  
50  
51  
52  
53  
54  
55  
56  
57  
58  
59  
60  
61  
62  
63  
64  
65

1  
2  
3  
4  
5  
6  
7  
8  
9  
10  
11  
12  
13  
14  
15  
16  
17  
18  
19  
20  
21  
22  
23  
24  
25  
26  
27  
28  
29  
30  
31  
32  
33  
34  
35  
36  
37  
38  
39  
40  
41  
42  
43  
44  
45  
46  
47  
48  
49  
50  
51  
52  
53  
54  
55  
56  
57  
58  
59  
60  
61  
62  
63  
64  
65

**Fig. S1.**

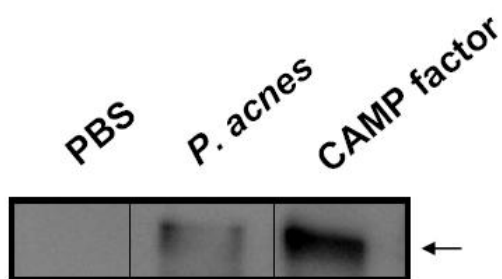

Fig. S2.

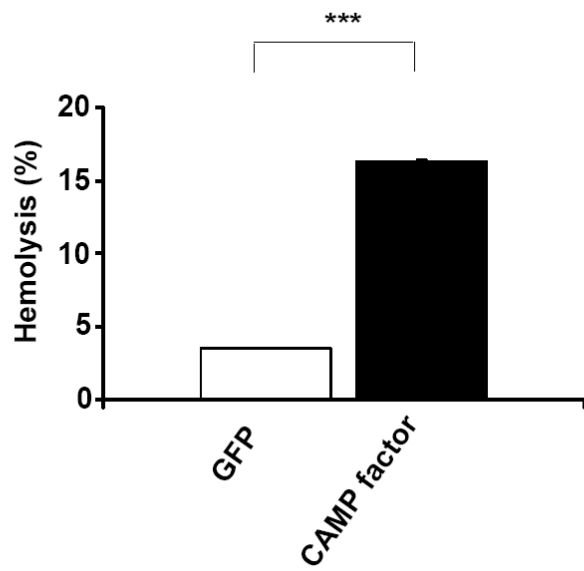

**Fig. S3.**

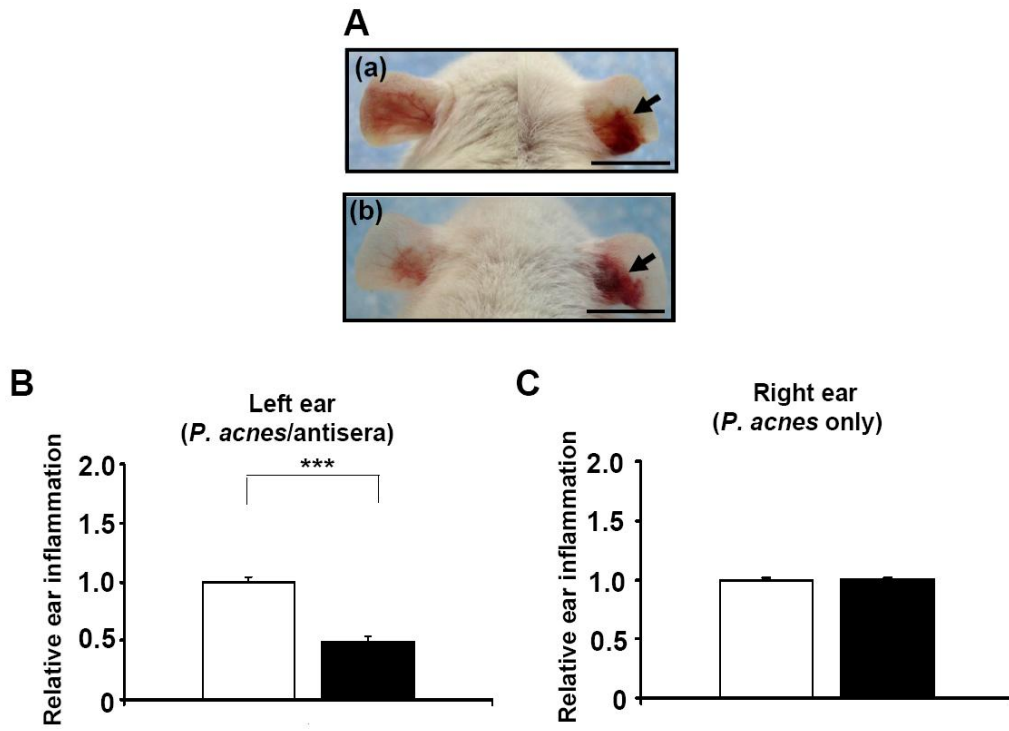

1  
2  
3  
4  
5  
6  
7  
8  
9  
10  
11  
12  
13  
14  
15  
16  
17  
18  
19  
20  
21  
22  
23  
24  
25  
26  
27  
28  
29  
30  
31  
32  
33  
34  
35  
36  
37  
38  
39  
40  
41  
42  
43  
44  
45  
46  
47  
48  
49  
50  
51  
52  
53  
54  
55  
56  
57  
58  
59  
60  
61  
62  
63  
64  
65

**Fig. S4.**

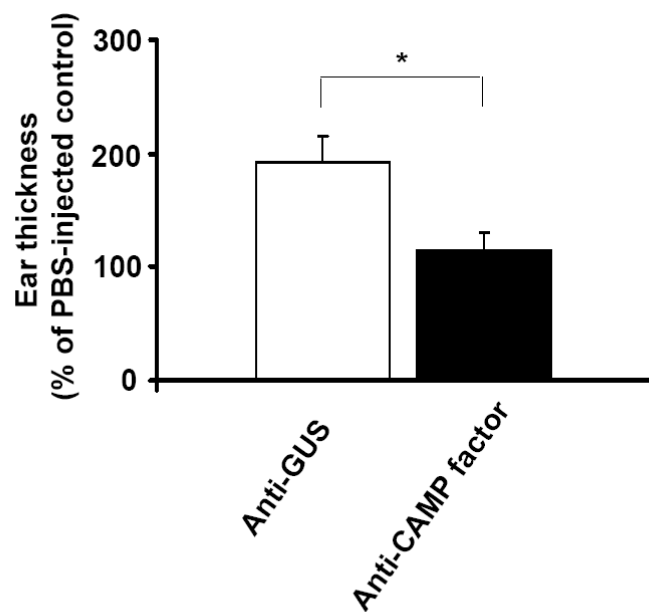



1  
2  
3  
4  
5  
6  
7  
8  
9  
10  
11  
12  
13  
14  
15  
16  
17  
18  
19  
20  
21  
22  
23  
24  
25  
26  
27  
28  
29  
30  
31  
32  
33  
34  
35  
36  
37  
38  
39  
40  
41  
42  
43  
44  
45  
46  
47  
48  
49  
50  
51  
52  
53  
54  
55  
56  
57  
58  
59  
60  
61  
62  
63  
64  
65
